# Supplementary material
Source: HighWire-hosted journal article supplement (https://svn.bmj.com/content/7/1/e001122)
Supplement: inline-supplementary-material-2 [file inline-supplementary-material-2.pdf]

**Supplementary Table 1.** Risk of Bias Assessment for Observational Studies (Robins-I Tool).

| <b>Study</b>           | <b>Confounding</b> | <b>Selection</b> | <b>Measurement of Interventions</b> | <b>Deviations from Intended Interventions</b> | <b>Missing Data</b> | <b>Measurement of Data</b> | <b>Selection of Reported Result</b> |
|------------------------|--------------------|------------------|-------------------------------------|-----------------------------------------------|---------------------|----------------------------|-------------------------------------|
| Yoshida et al.[18]     | Moderate           | Low              | Low                                 | Low                                           | Moderate            | Low                        | Low                                 |
| Ballotta et al.[19]    | Moderate           | Low              | Low                                 | Low                                           | Moderate            | Low                        | Low                                 |
| Yoshida et al.[20]     | Moderate           | Low              | Low                                 | Low                                           | Moderate            | Low                        | Low                                 |
| Takai et al.[21]       | Moderate           | Low              | Low                                 | Low                                           | Moderate            | Low                        | Low                                 |
| Kashiwazaki et al.[22] | Moderate           | Low              | Low                                 | Low                                           | Moderate            | Low                        | Low                                 |
| Nardi et al.[23]       | Moderate           | Low              | Low                                 | Low                                           | Moderate            | Low                        | Low                                 |
